# Supplementary material for: The ubiquitin ligases Cbl and Cbl-b regulate macrophage growth by controlling CSF-1R import into macropinosomes
Source: PubMed Central journal article supplement — Mol Biol Cell. 2024 Feb 2;35(3):ar38. doi: 10.1091/mbc.E23-09-0345 (PMC10916879; doi:10.1091/mbc.e23-09-0345), 2024-02-02
Supplement: mbc-35-ar38-s001.pdf [file mbc-35-ar38-s001.pdf]

# Supplemental Materials

*Molecular Biology of the Cell*

Huang *et al.*

Supplementary figures

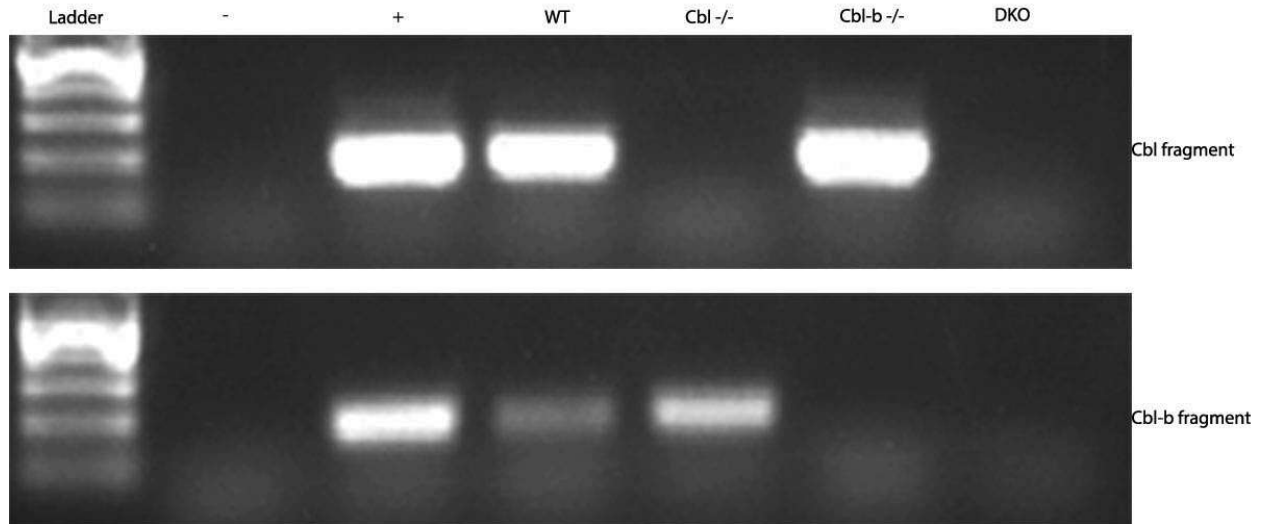

**Figure S1. Gene knock out validation of macrophages by PCR.** Gnomonic DNA from different genotypes of macrophages were used as template in PCR to verify knocked out genotypes. Cbl fragment is amplified from WT, Cbl-b<sup>-/-</sup>, but not in Cbl<sup>-/-</sup>, and Cbl-b fragment is amplified from WT and Cbl<sup>-/-</sup>, not in Cbl-b<sup>-/-</sup>.

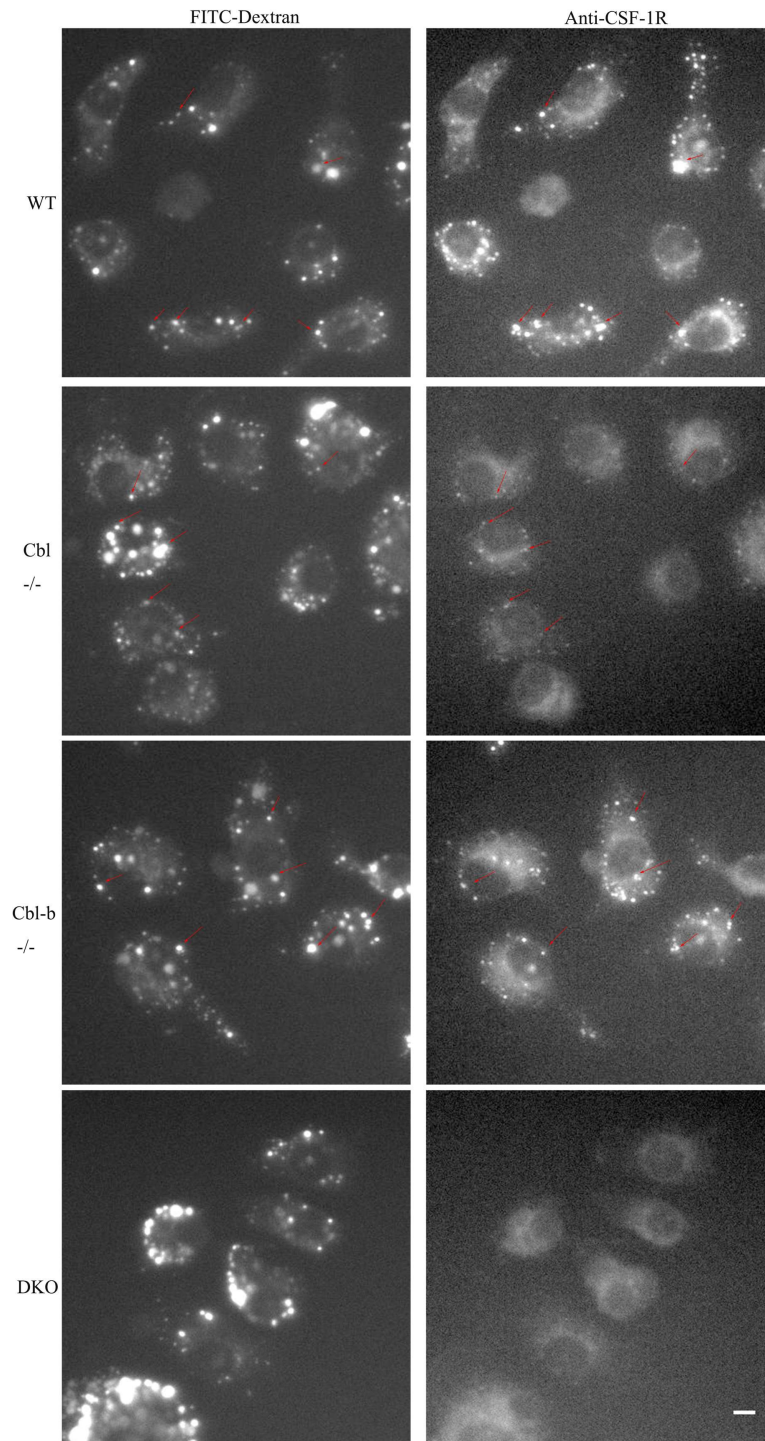

**Figure S2. Defect of CSF-1R transport to macropinosomes in DKO macrophages.** FITC-dextran (150 kD) labeled macropinosomes were sequentially permeabilized and then were probed for CSF-1R using anti-CSF-1R antibody-Dylight 594. Arrows indicate that macropinosomes (left) contain CSF-1R(Right). Scale bar = 5um.

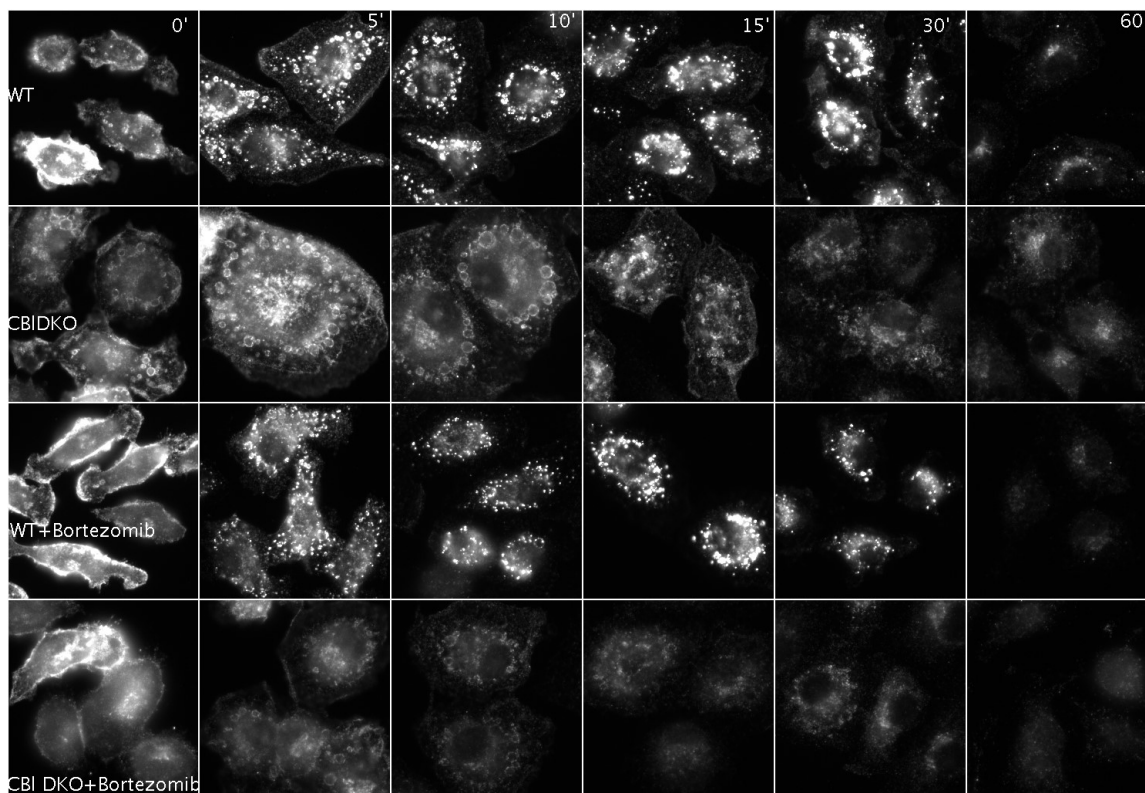

**Figure S3. CSF-1R degradation in DKO macrophages was not a proteasome dependent pathway.**

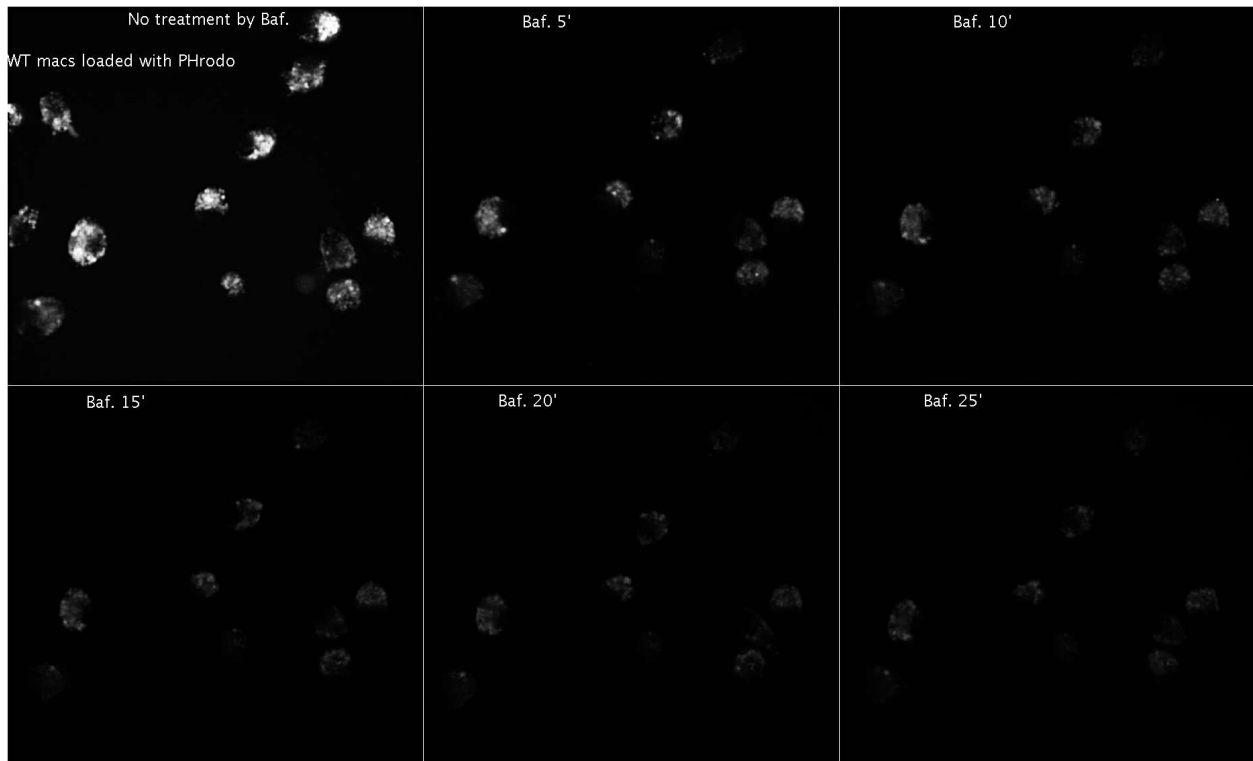

**Figure S4. Neutralization of lysosomes by Bafilomycin A1.** Macrophages were loaded with pHrodoRed-Dextran for 2h and then exposed to BafilomycinA1 at 100nM. Loss of pHrodoRed by about 15 min indicates neutralization of the lysosome.

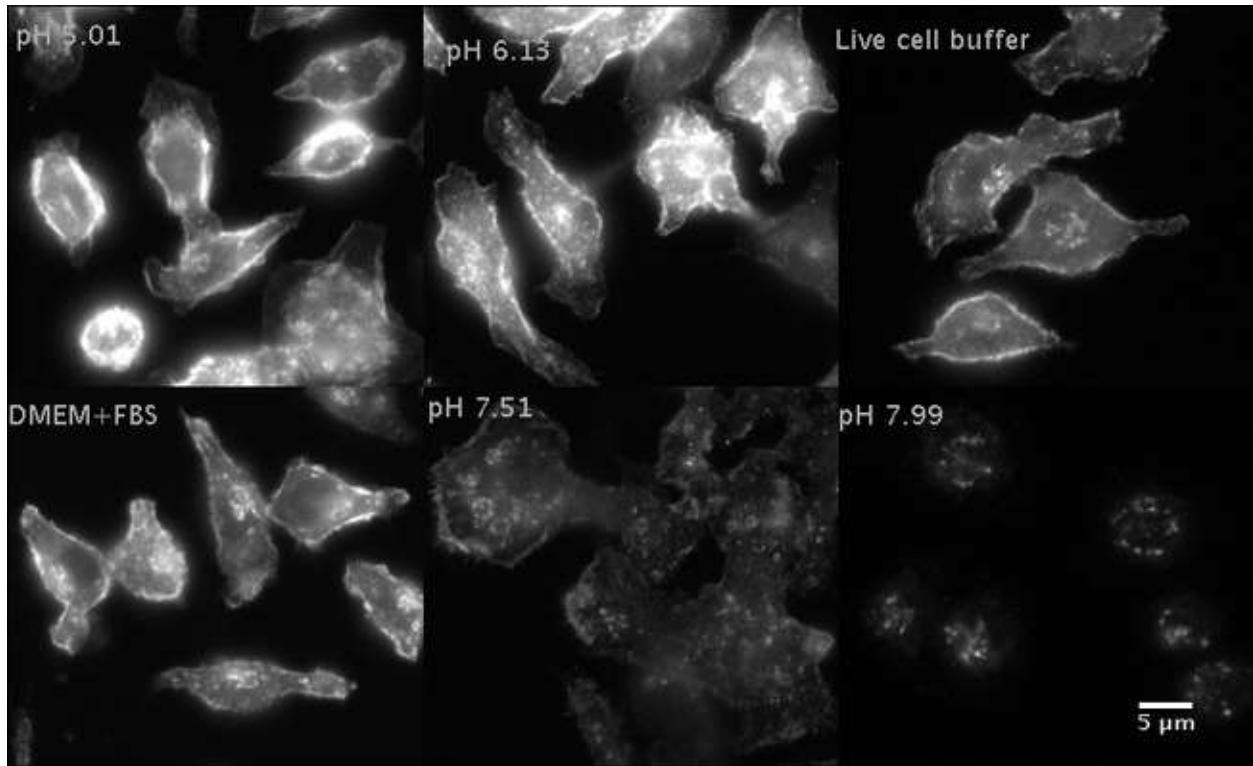

**Figure S5. Media pH modulates CSF-1R traffic.** Bone marrow derived macrophages were cultured for 15 min in live cell imaging buffer in air at 37 C with pH adjusted by adding HCl or NaOH as indicated or cultured in DMEM+10%FBS in a CO<sub>2</sub> incubator. pH of live cell buffer is 7.2.
